# Supplementary material
Source: publisher site journal article supplement (https://www.dovepress.com/article/328213)
Supplement: Supplementary file 1 [file get_supplementary_file.php]

**
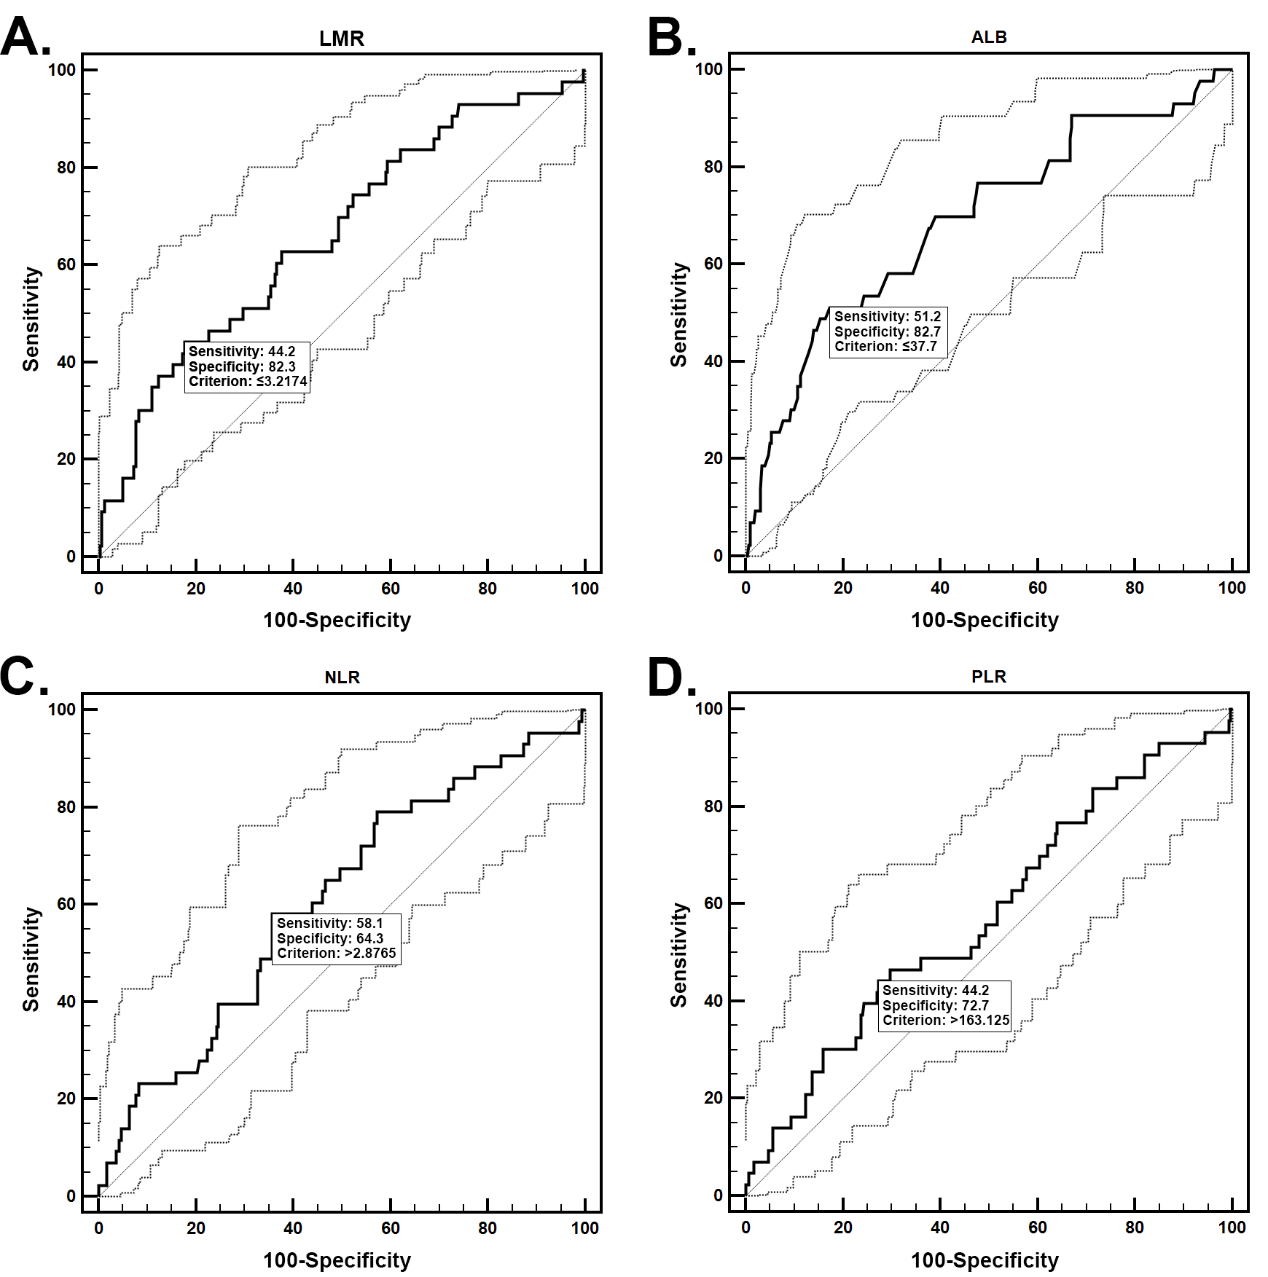
**

**Figure S1.** ROC curve predictive the optimal cutoff values of LMR, albumin, NLR and PLR. **A**. LMR; **B**, Albumin; **C**, NLR; **D**, PLR.

Abbreviations: ROC, receiver operating characteristic; LMR, lymphocyte to monocyte ratio; NLR, neutrophil to lymphocyte ratio; PLR, platelet to lymphocyte ratio.


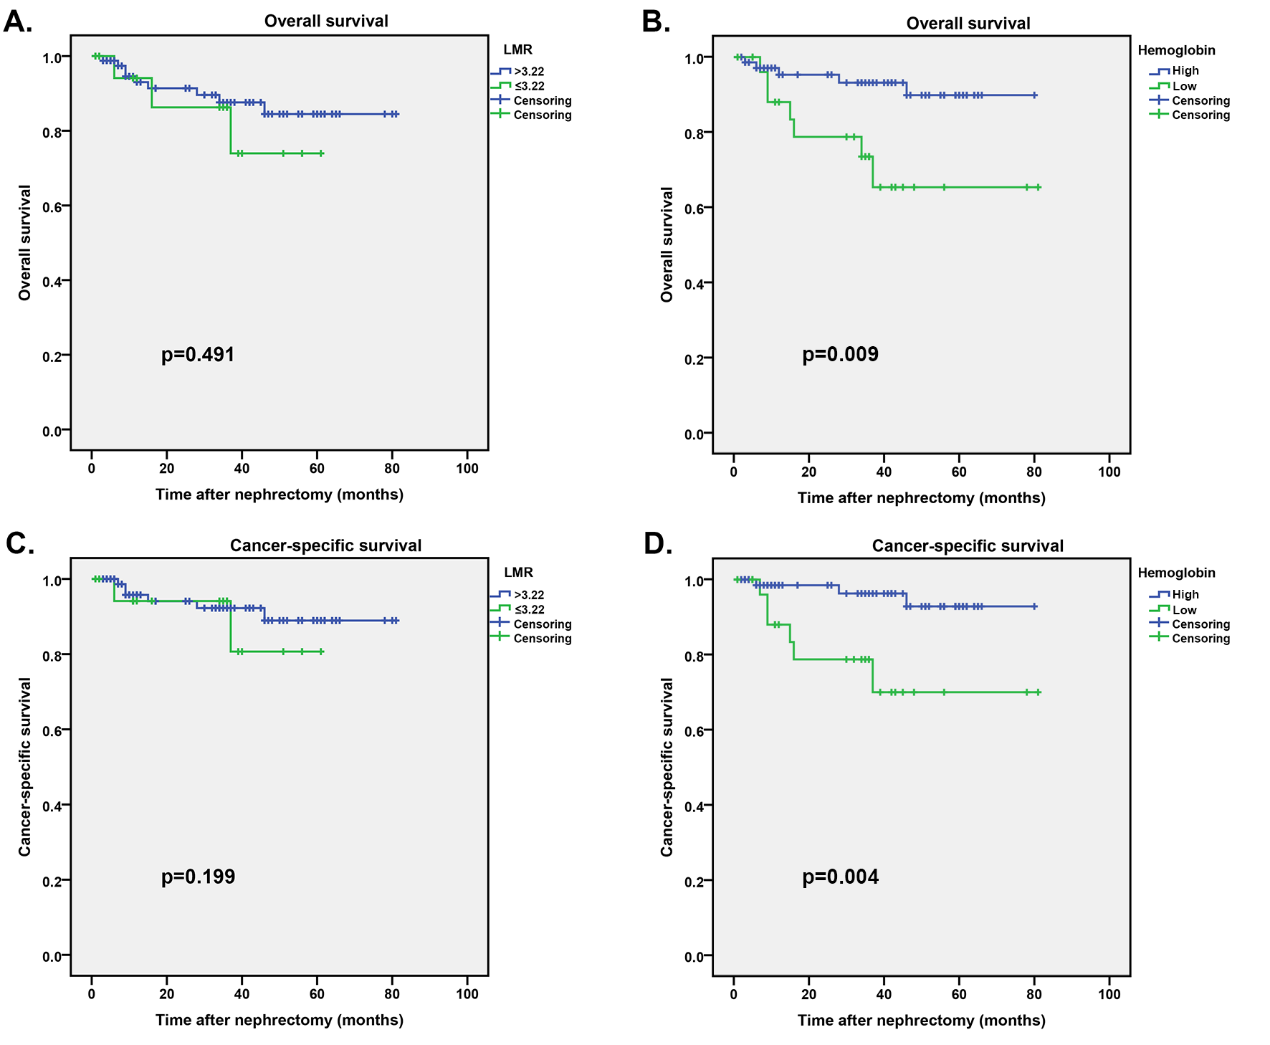


**Figure S2.** Kaplan-Meier curves for OS and CSS stratified by LMR and hemoglobin in the validation group. **A** and **C**, LMR OS and CSS; **B** and **D**, Hemoglobin OS and CSS.

Abbreviations: LMR, lymphocyte to monocyte ratio; OS, overall survival; CSS, cancer-specific survival.


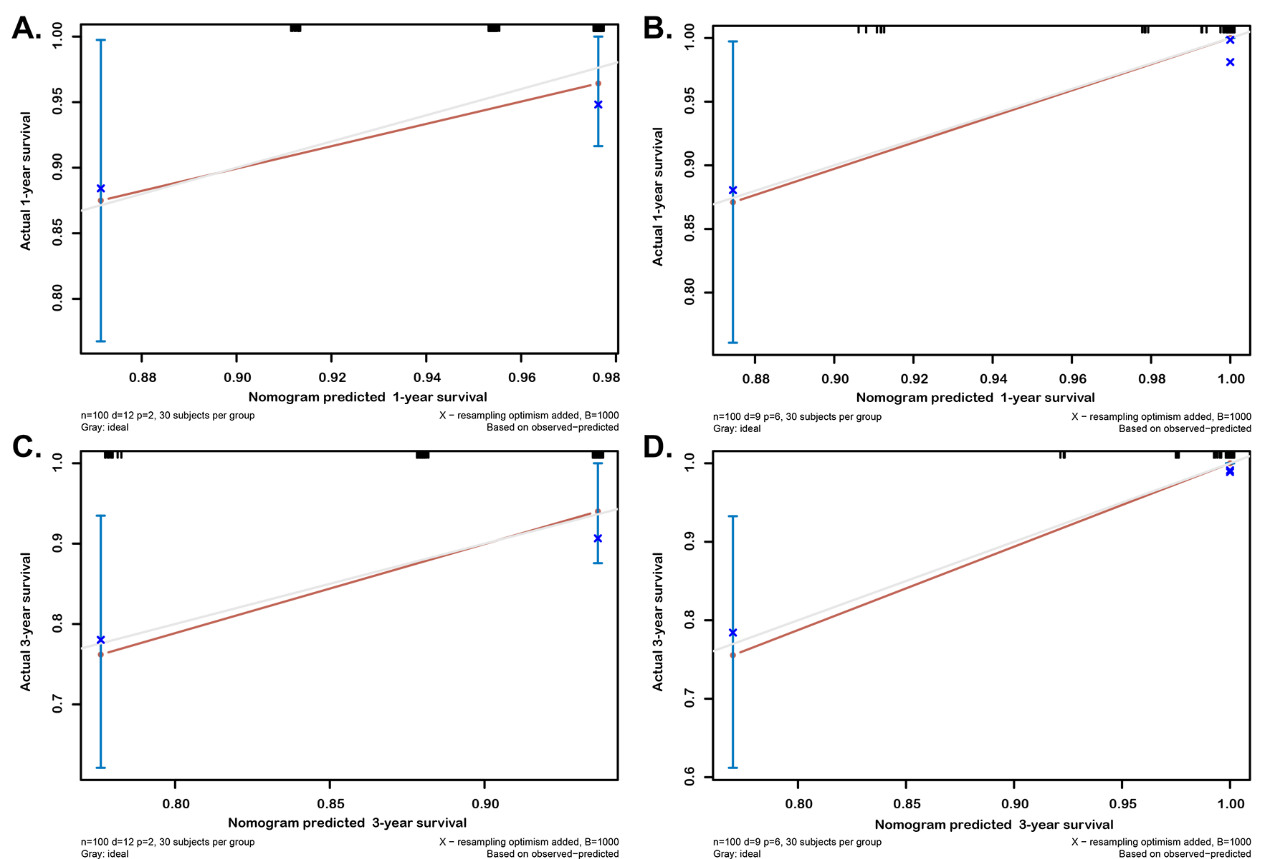


**Figure S3.** Calibration plot of the nomogram for predicting 1-year and 3-year OS and CSS in validation cohort. **A**, 1-year OS; **B**, 1-year CSS; **C**, 3-year OS; **D**, 3-year CSS.

**Table S1.** Clinical characteristics of the patients according to LMR and hemoglobin in the validation group.

| **Characteristic** |  | **LMR** | | **P**  **value** | **Hemoglobin** | | **P**  **value** |
| --- | --- | --- | --- | --- | --- | --- | --- |
| **All** | **High group** | **Low group** | **High group** | **Low group** |
| **patients** | **N=81** | **N=19** | **N=72** | **N=28** |
| Age categorized, y | 100 |  |  | <0.001 |  |  | 0.032 |
| ≤ 65 | 63 (63.0) | 58 (71.6) | 5 (26.3) |  | 50 (69.4) | 13 (46.4) |  |
| > 65 | 37 (37.0) | 23 (28.4) | 14 (73.7) |  | 22 (30.6) | 15 (53.6) |  |
| Gender |  |  |  | 0.697 |  |  | 0.009 |
| Male | 70 (70.0) | 56 (69.1) | 14 (73.7) |  | 45 (62.5) | 25 (89.3) |  |
| Female | 30 (30.0) | 25 (30.9) | 5 (26.3) |  | 27 (37.5) | 3 (10.7) |  |
| BMI categorized, kg/m2 |  |  |  | 0.186 |  |  | 0.034 |
| < 25 | 66 (66.0) | 51 (63.0) | 15 (78.9) |  | 43 (59.7) | 23 (82.1) |  |
| ≥ 25 | 34 (34.0) | 30 (37.0) | 4 (21.1) |  | 29 (40.3) | 5 (17.9) |  |
| Hypertension |  |  |  | 0.212 |  |  | 0.413 |
| No | 60 (60.0) | 51 (63.0) | 9 (47.4) |  | 45 (62.5) | 15 (53.6) |  |
| Yes | 40 (40.0) | 30 (37.0) | 10 (52.6) |  | 27 (37.5) | 13 (46.4) |  |
| Diabetes |  |  |  | 0.470 |  |  | 0.126 |
| No | 84 (84.0) | 67 (82.7) | 17 (89.5) |  | 63 (87.5) | 21 (75.0) |  |
| Yes | 16 (16.0) | 14 (17.3) | 2 (10.5) |  | 9 (12.5) | 7 (25.0) |  |
| Cardiovascular diseases |  |  |  | 0.164 |  |  | 0.533 |
| No | 92 (92.0) | 76 (83.8) | 16 (84.2) |  | 67 (93.1) | 25 (89.3) |  |
| Yes | 8 (8.0) | 5 (6.2) | 3 (15.8) |  | 5 (6.9) | 3 (10.7) |  |
| Smoking |  |  |  | 0.173 |  |  | 0.006 |
| No | 84 (84.0) | 70 (86.4) | 14 (73.7) |  | 65 (90.3) | 19 (67.9) |  |
| Yes | 16 (16.0) | 11 (13.6) | 5 (26.3) |  | 7 (9.7) | 9 (32.1) |  |
| Surgery type |  |  |  | 0.120 |  |  | 0.128 |
| Partial nephrectomy | 81 (81.0) | 68 (84.0) | 13 (68.4) |  | 61 (84.7) | 20 (71.4) |  |
| Radical nephrectomy | 19 (19.0) | 13 (16.0) | 6 (31.6) |  | 11 (15.3) | 8 (28.6) |  |
| Laterality |  |  |  | 0.290 |  |  | 0.708 |
| Left | 53 (53.0) | 36 (44.4) | 11 (57.9) |  | 39 (54.2) | 14 (50.0) |  |
| Right | 47 (47.0) | 45 (55.6) | 8 (42.1) |  | 33 (45.8) | 14 (50.0) |  |
| AJCC stage |  |  |  | 0.616 |  |  | 0.263 |
| I | 73 (73.0) | 60 (74.1) | 13 (68.4) |  | 54 (75.0) | 19 (67.9) |  |
| II | 7 (7.0) | 5 (6.2) | 2 (10.5) |  | 6 (8.3) | 1 (3.6) |  |
| III | 15 (15.0) | 15 (18.5) | 3 (15.8) |  | 10 (13.9) | 8 (28.6) |  |
| IV | 5 (5.0) | 1 (1.2) | 1 (5.3) |  | 2 (2.8) | 0 (0.0) |  |
| T-stage |  |  |  | 0.604 |  |  | 0.088 |
| T1 | 76 (76.0) | 63 (77.8) | 13 (68.4) |  | 57 (79.2) | 19 (67.9) |  |
| T2 | 7 (7.0) | 5 (6.2) | 2 (10.5) |  | 6 (8.3) | 1 (3.6) |  |
| T3 | 15 (15.0) | 12 (14.8) | 3 (15.8) |  | 7 (9.7) | 8 (28.6) |  |
| T4 | 2 (2.0) | 1 (1.2) | 1 (5.3) |  | 2 (2.8) | 0 (0.0) |  |
| N-stage |  |  |  | 0.267 |  |  | 0.683 |
| N0 | 95 (95.0) | 76 (93.8) | 19 (100.0) |  | 68 (94.4) | 27 (96.4) |  |
| N1 | 5 (5.0) | 5 (6.2) | 0 (0.0) |  | 4 (5.6) | 1 (3.6) |  |
| M-stage |  |  |  | 0.394 |  |  | 0.005 |
| M0 | 97 (97.0) | 78 (96.3) | 19 (100.0) |  | 72 (100.0) | 25 (89.3) |  |
| M1 | 3 (3.0) | 3 (3.7) | 0 (0.0) |  | 0 (0.0) | 3 (10.7) |  |
| Fuhrman grade |  |  |  | 0.707 |  |  | 0.135 |
| I | 19 (19.0) | 15 (18.5) | 4 (21.1) |  | 14 (19.4) | 5 (17.9) |  |
| II | 60 (60.0) | 50 (61.7) | 10 (52.6) |  | 45 (62.5) | 15 (53.6) |  |
| III | 19 (19.0) | 14 (17.3) | 5 (26.3) |  | 13 (18.1) | 6 (21.4) |  |
| IV | 2 (2.0) | 2 (2.5) | 0 (0.0) |  | 0 (0.0) | 2 (7.1) |  |

**Abbreviations:**

LMR, lymphocyte to monocyte ratio; BMI, Body mass index; AJCC, American Joint Committee on Cancer.

**Table S2.** Baseline characteristics of the patients according to SIRI in the validation group**.**

| **Characteristic** | **SIRI** | | | **P**  **value** |
| --- | --- | --- | --- | --- |
| **Grade 1** | **Grade 2** | **Grade 3** |
| **No. (%)** | **No. (%)** | **No. (%)** |
| All patients | 64 (64.0) | 25 (25.0) | 11 (11.0) |  |
| Age, y |  |  |  | 0.002 |
| ≤ 65 | 47 (73.4) | 14 (56.0) | 2 (18.2) |  |
| > 65 | 17 (26.6) | 11 (44.0) | 9 (81.8) |  |
| Gender |  |  |  | 0.092 |
| Male | 40 (62.5) | 21 (84.0) | 9 (81.8) |  |
| Female | 24 (37.5) | 4 (16.0) | 2 (18.2) |  |
| BMI, kg/m2 |  |  |  | 0.096 |
| < 25 | 38 (59.4) | 18 (72.0) | 10 (90.9) |  |
| ≥ 25 | 26 (40.6) | 7 (28.0) | 1 (9.1) |  |
| Hypertension |  |  |  | 0.289 |
| No | 42 (65.6) | 12 (48.0) | 6 (54.5) |  |
| Yes | 22 (34.4) | 13 (52.0) | 5 (45.5) |  |
| Diabetes |  |  |  | 0.161 |
| No | 56 (87.5) | 18 (72.0) | 10 (90.9) |  |
| Yes | 8 (12.5) | 7 (28.0) | 1 (9.1) |  |
| Cardiovascular diseases |  |  |  | 0.403 |
| No | 60 (93.8) | 23 (92.0) | 9 (81.8) |  |
| Yes | 4 (6.2) | 2 (8.0) | 2 (18.2) |  |
| Smoking |  |  |  | 0.036 |
| No | 58 (90.6) | 19 (76.0) | 7 (63.6) |  |
| Yes | 6 (9.4) | 6 (24.0) | 4 (36.4) |  |
| Surgery type |  |  |  | 0.082 |
| Partial nephrectomy | 56 (87.5) | 17 (68.0) | 8 (72.7) |  |
| Radical nephrectomy | 8 (12.5) | 8 (32.0) | 3 (27.3) |  |
| Laterality |  |  |  | 0.679 |
| Left | 36 (56.2) | 12 (48.0) | 5 (45.5) |  |
| Right | 28 (43.8) | 13 (52.0) | 6 (54.5) |  |
| AJCC stage |  |  |  | 0.449 |
| I | 50 (78.1) | 14 (56.0) | 9 (81.8) |  |
| II | 4 (6.2) | 3 (12.0) | 0 (0.0) |  |
| III | 9 (14.1) | 7 (28.0) | 2 (18.2) |  |
| IV | 1 (1.6) | 1 (4.0) | 0 (0.0) |  |
| T-stage |  |  |  | 0.204 |
| T1 | 53 (82.8) | 14 (56.0) | 9 (81.8) |  |
| T2 | 4 (6.2) | 3 (12.0) | 0 (0.0) |  |
| T3 | 6 (9.4) | 7 (28.0) | 2 (18.2) |  |
| T4 | 1 (1.6) | 1 (4.0) | 0 (0.0) |  |
| N-stage |  |  |  | 0.656 |
| N0 | 60 (93.8) | 24 (96.0) | 11 (100.0) |  |
| N1 | 4 (6.2) | 1 (4.0) | 0 (0.0) |  |
| M-stage |  |  |  | 0.010 |
| M0 | 64 (100.0) | 22 (88.0) | 11 (100.0) |  |
| M1 | 0 (0.02) | 3 (12.0) | 0 (0.0) |  |
| Fuhrman grade |  |  |  | 0.171 |
| I | 13 (20.3) | 3 (12.0) | 3 (27.3) |  |
| II | 41 (64.1) | 13 (52.0) | 6 (54.5) |  |
| III | 10 (15.6) | 7 (28.0) | 2 (18.2) |  |
| IV | 0 (0.0) | 2 (8.0) | 0 (0.0) |  |

**Abbreviations:**

SIRI, systemic inflammation response index; BMI, Body mass index; AJCC, American Joint Committee on Cancer.
